# Supplementary material for: Algorithmic hospital catchment area estimation using label propagation
Source: BMC Health Serv Res. 2022 Jun 27;22:828. doi: 10.1186/s12913-022-08127-7 (PMC9235278; doi:10.1186/s12913-022-08127-7)
Supplement: Supplementary file 2 — Additional file 2 Supplementary data - surge capacity estimates. A curated data set of estimated acute and ITU bed capacity in the NHS and private hospitals at the start of the pandemic, in England, Wales, and Scotland. [file 12913_2022_8127_MOESM2_ESM.xlsx]

## Sheet: Sheet 1
nation
